# Supplementary figures and images for: Identification of Inflammatory Gene in the Congenital Heart Surgery Patients following Cardiopulmonary Bypass via the Way of WGCNA and Machine Learning Algorithms
Source: Hindawi journal article supplement (doi:10.1155/2023/5493415), 2023-04-12

**A**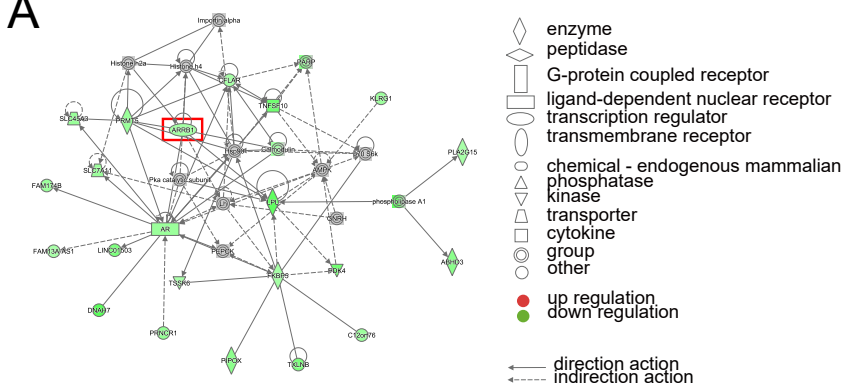**B**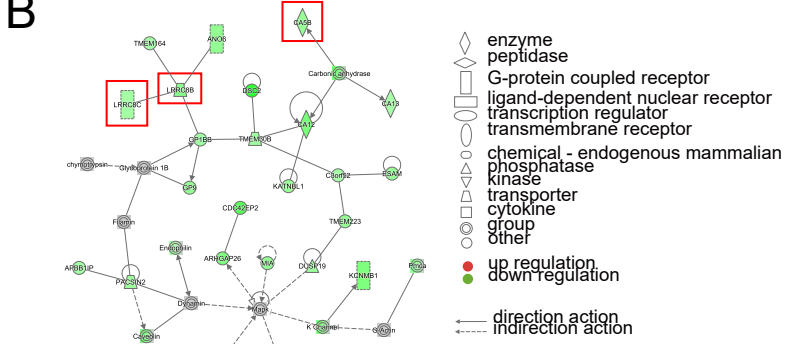**C**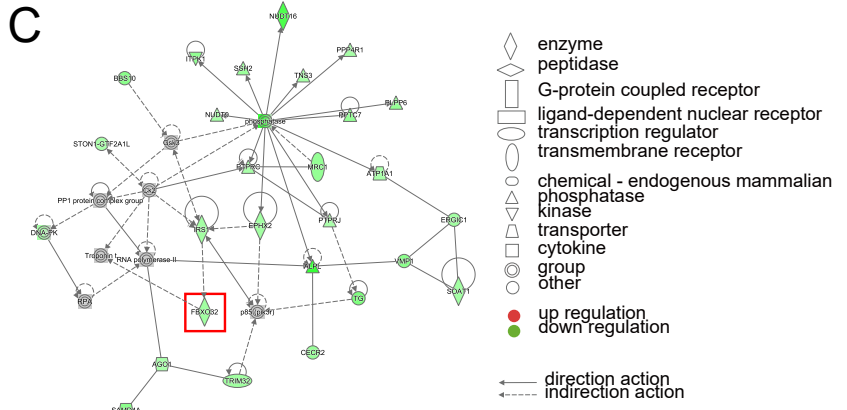**D**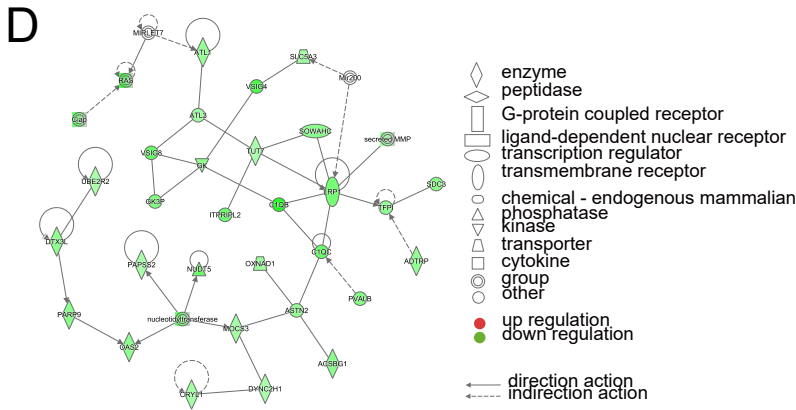**E**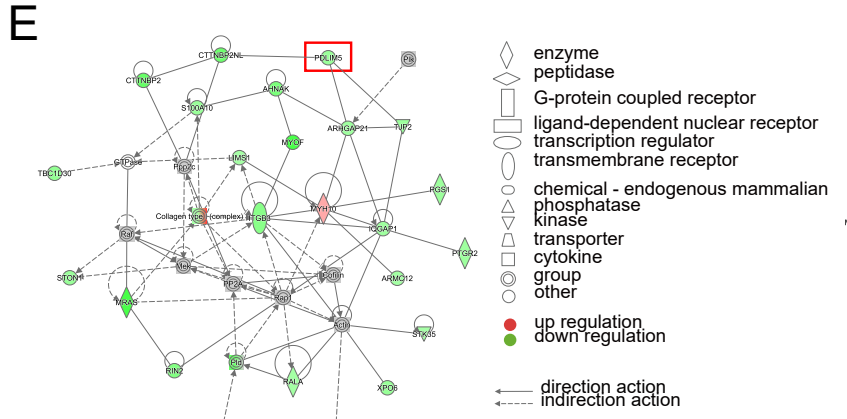**F**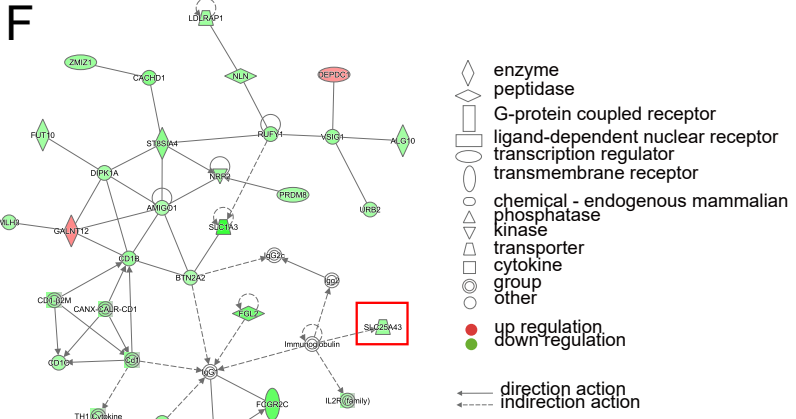**G**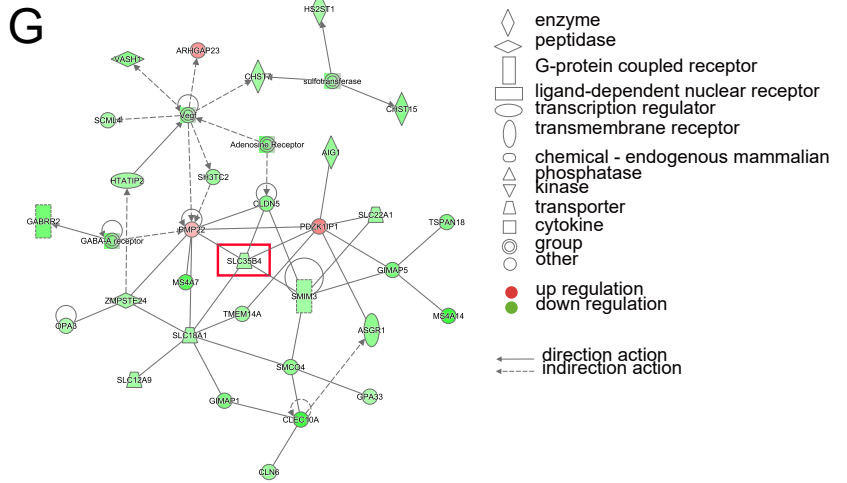

Supplement: f1 [file 5493415.f1.pdf]
